# Supplementary material for: First Report of the Emerging Pathogen<em> Kodamaea ohmeri </em>in Honduras
Source: Preprints.org preprint supplement (doi:10.20944/preprints202402.0018.v1), 2024-02-01
Supplement: Supplementary file 1 [file supplementary]

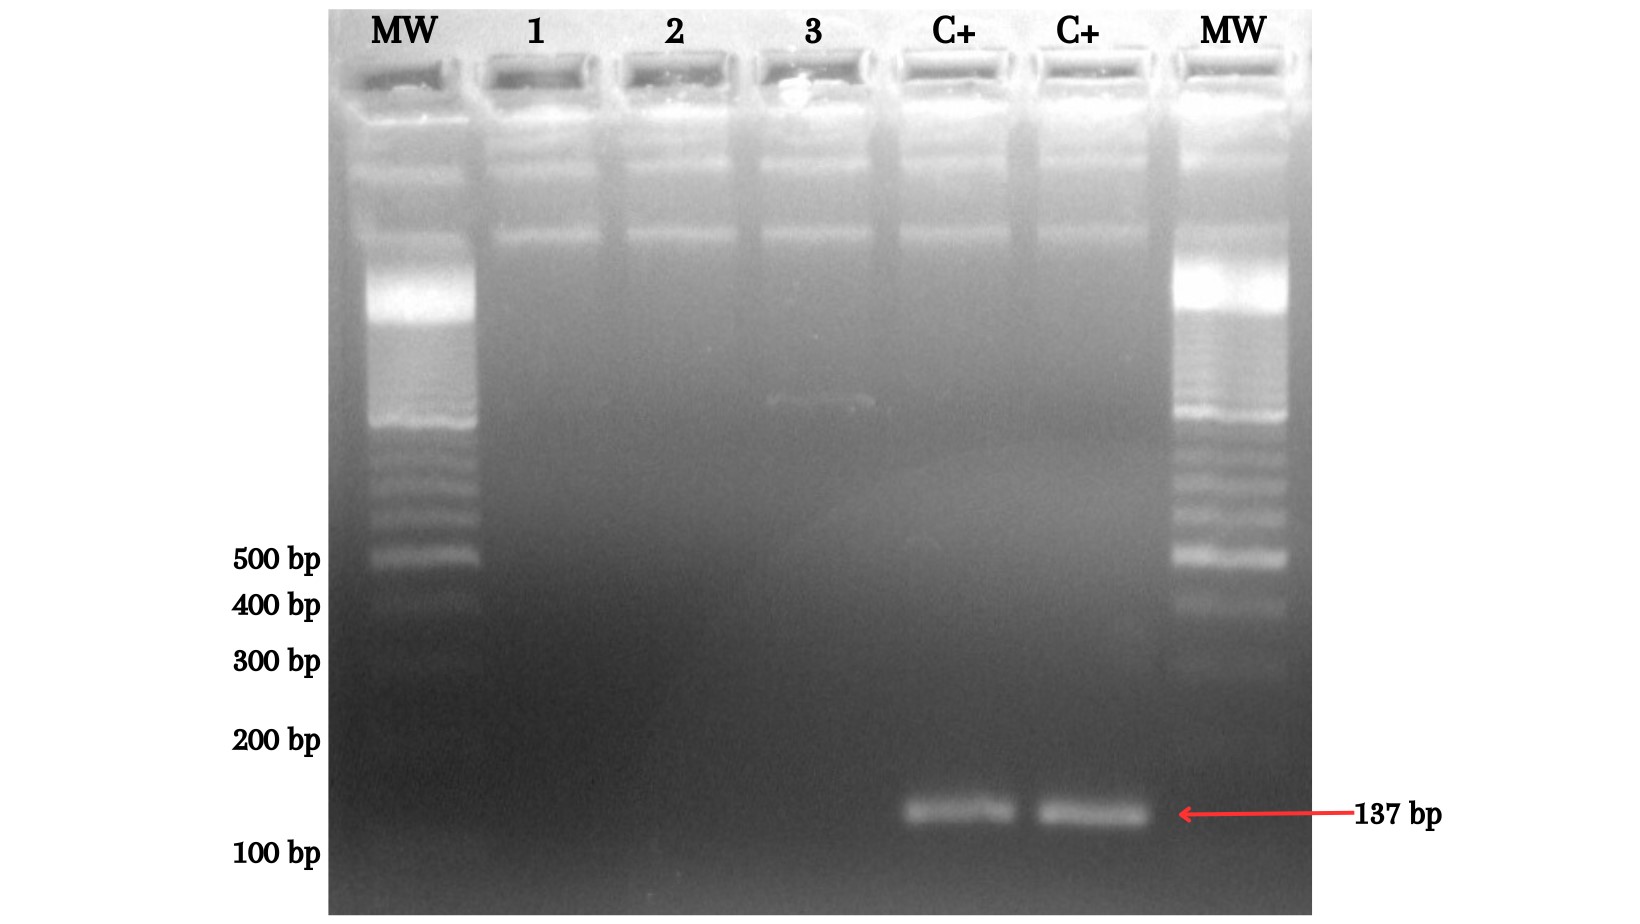


**Figure S1.** Agarose gel electrophoresis. Lanes 5 to 6 show a 137 bp band as a result of amplification of the GPI gene from the *C. auris* reference strain. Lanes 1, 2 and 3 isolates of *K. ohmeri*, no amplification products are observed. Molecular weight marker from lanes 1 and 7 (size 100 bp).

**
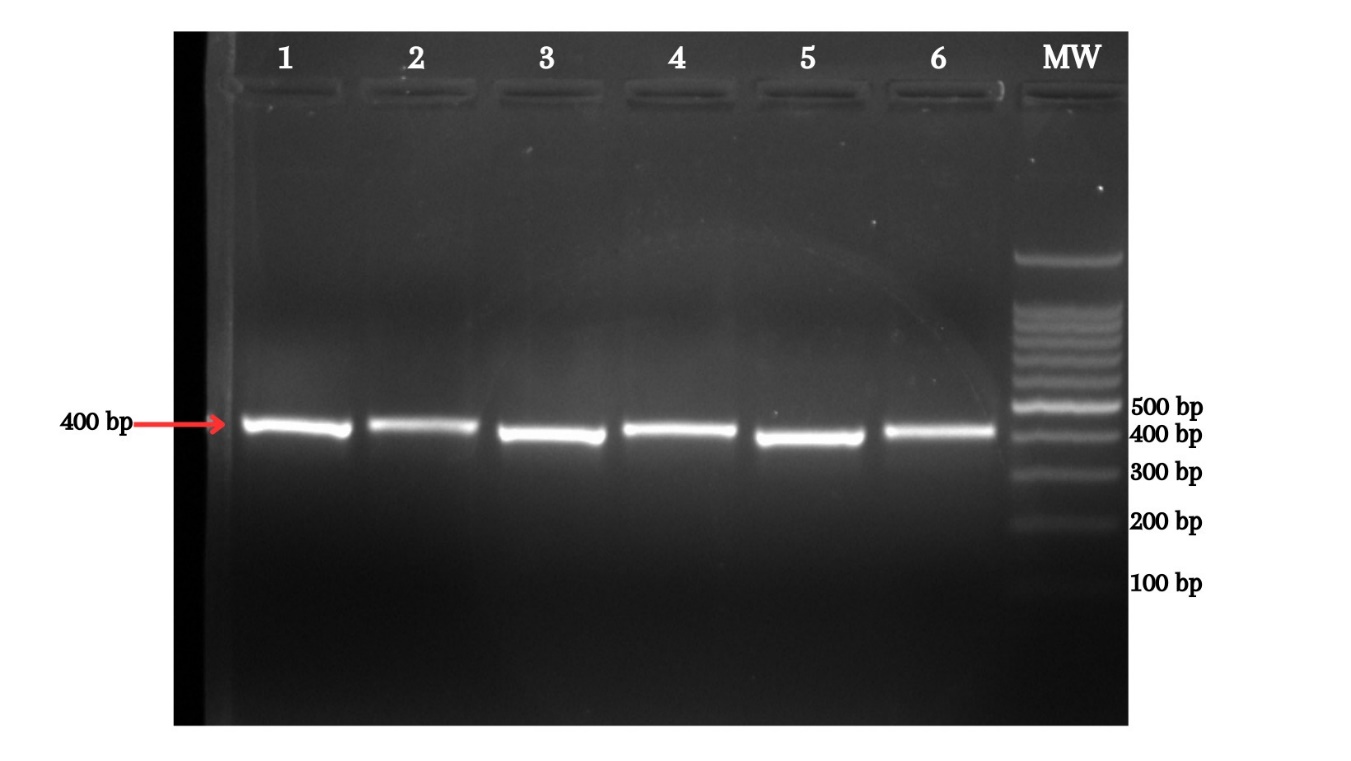
**

**Figure S2.** Agarose gel electrophoresis. Lanes 1, 3, and 5 show the amplification products of the internal transcribed spacer (ITS) of the ribosomal region of *K. ohmeri*. Lanes 2, 4, and 6 show the PCR products after being subjected to the MspI enzyme. Molecular weight marker lane 7 (size 100 bp).


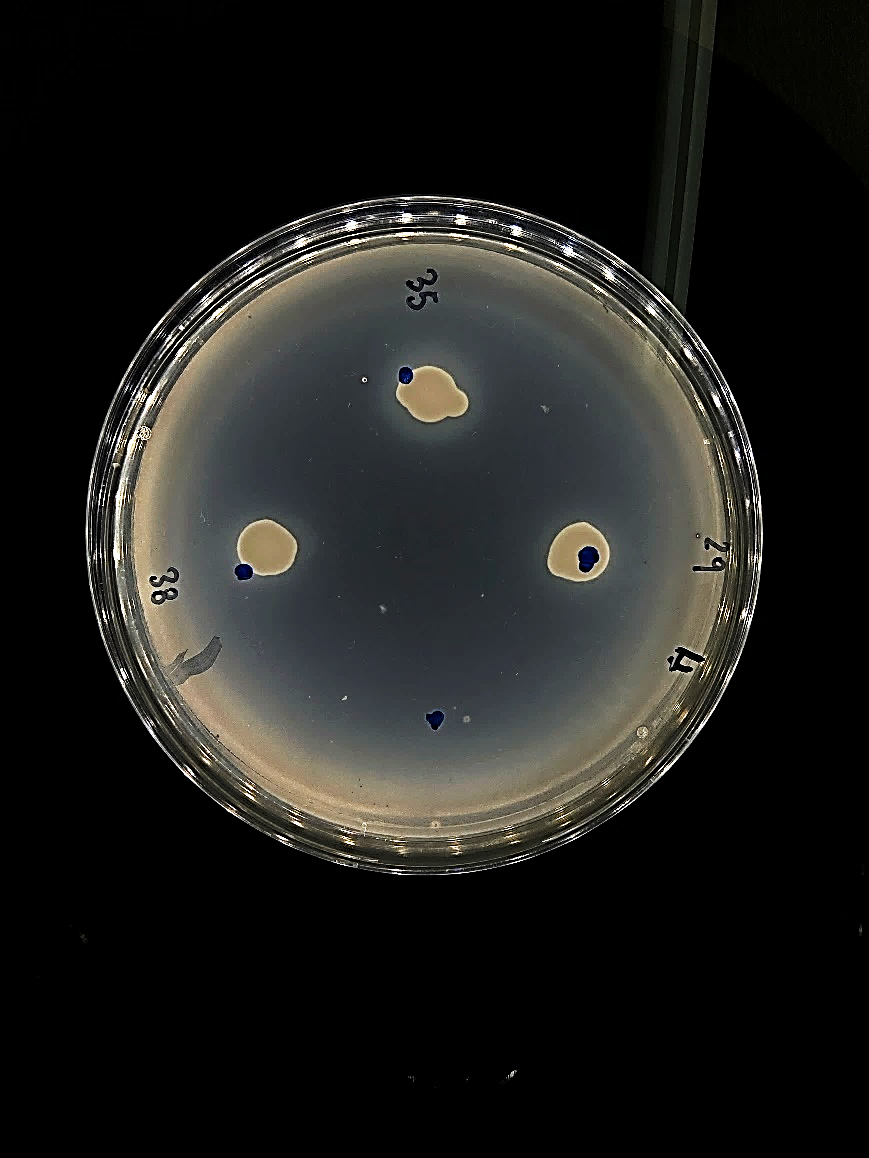


**Figure S3**. Determination of phospholipase activity of *Kodamaea ohmeri* isolates on Sabouraud agar supplemented with egg yolk.


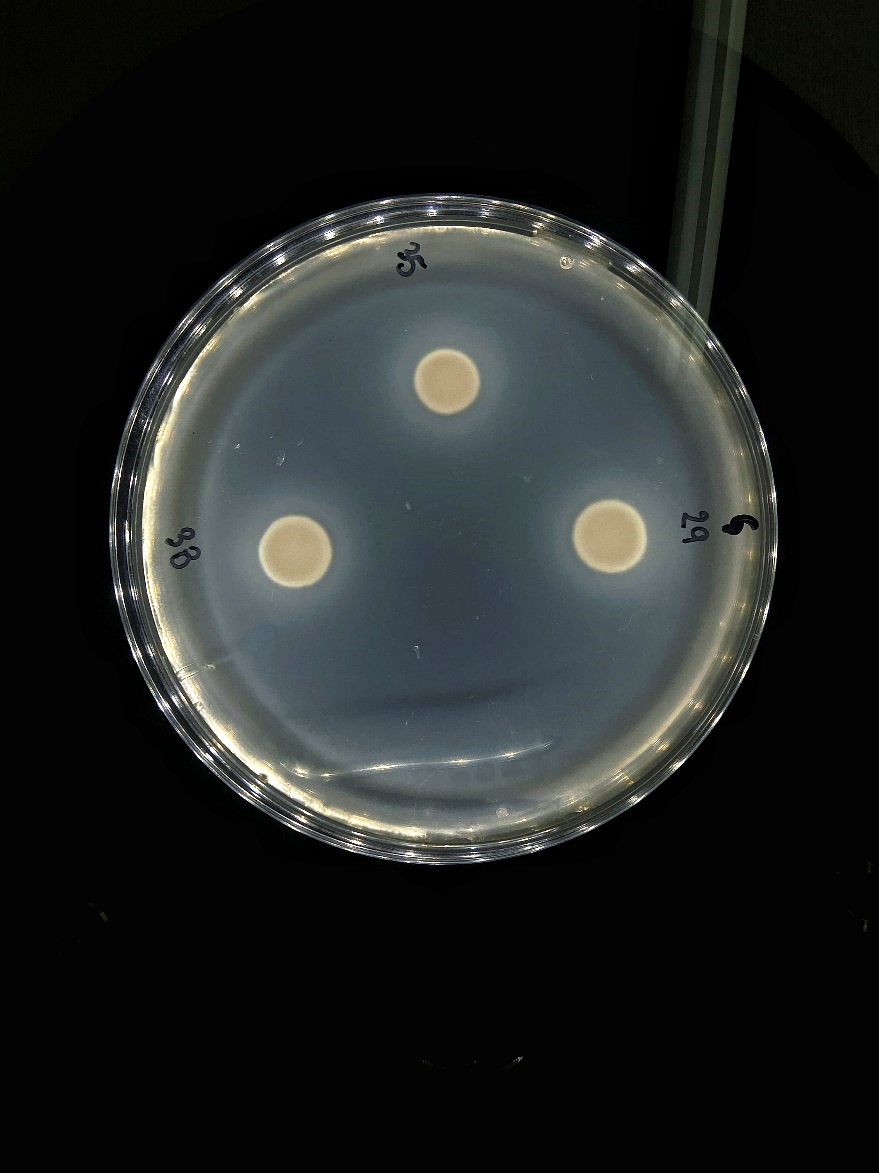


**Figure S4.** Determination of the protease activity of *Kodamaea ohmeri* isolates, gelatinase test.


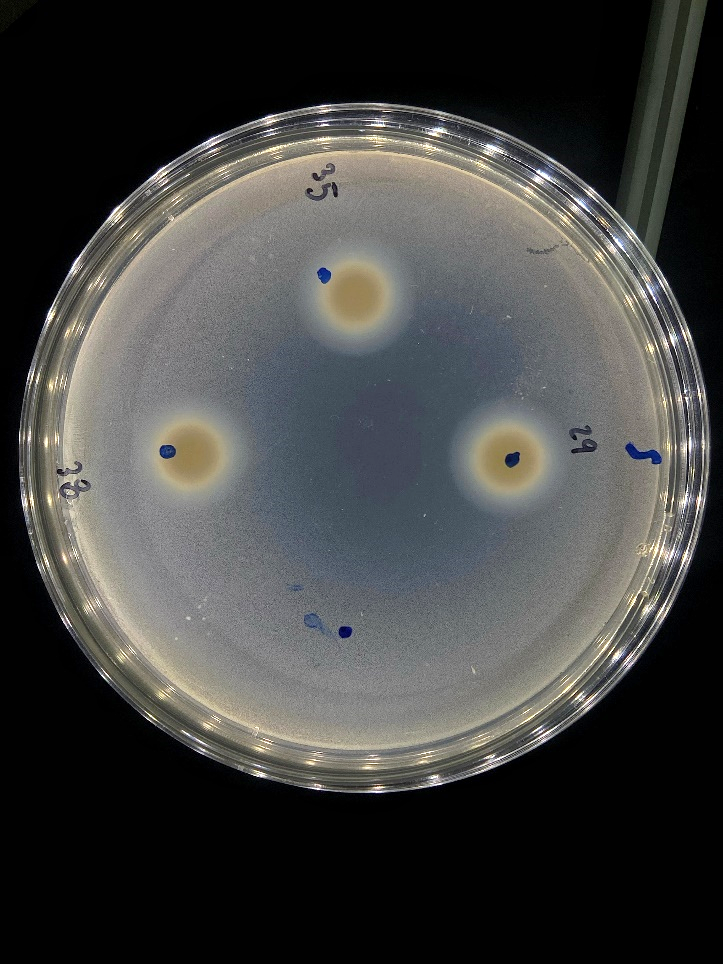


**Figure S5.** Determination of the protease activity of *Kodamaea ohmeri* isolates, Bovine serum albumin agar (BSA).


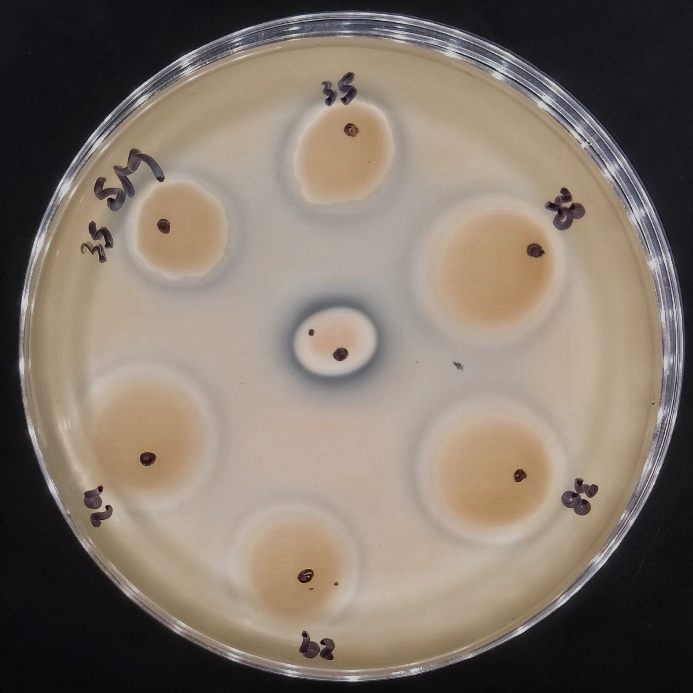


**Figure S6.** Determination of the protease activity of *Kodamaea ohmeri* isolates. Caseinase activity.


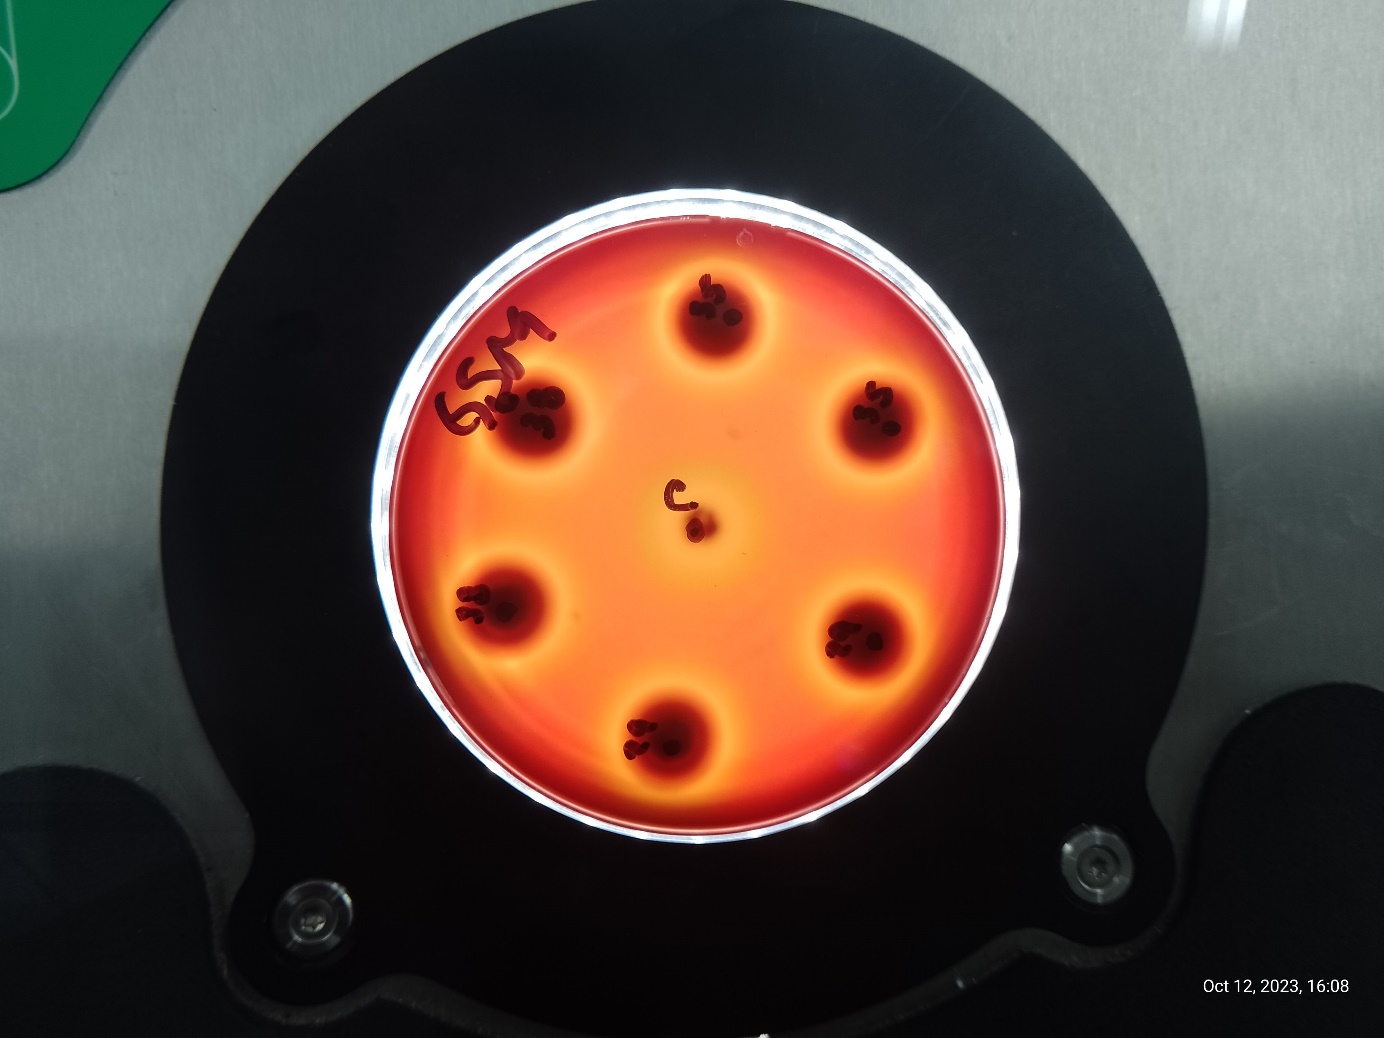


**Figure S7.** Determination of the hemolytic activity of *Kodamaea ohmeri* isolates. Test on Sabouraud agar supplemented with 6% human blood and 3% glucose (pH = 5.6).
